# Supplementary material for: Alginates along the filament of the brown alga Ectocarpus help cells cope with stress
Source: PubMed Central journal article supplement (PMC6736953; doi:10.1038/s41598-019-49427-z), 2019-09-10
Supplement: 41598_2019_49427_MOESM1_ESM.pdf [file 41598_2019_49427_MOESM1_ESM.pdf]

**Title: Alginates along the filament of the brown alga *Ectocarpus* help cells cope with stress.**

**Authors:** Hervé Rabillé<sup>1</sup>, Thomas A Torode<sup>2</sup>, Benoit Tesson<sup>3</sup>, Aude Le Bail<sup>1,\*</sup>, Bernard Billoud<sup>1</sup>, Elodie Rolland<sup>1</sup>, Sophie Le Panse<sup>4</sup>, Murielle Jam<sup>5</sup>, Bénédicte Charrier<sup>1\*</sup>

### Supplementary information

| Cell type | Correction factor | Corrected turgor (mosmoles) |        |        |        |        |        |        |        |        | t-test p-value |      |
|-----------|-------------------|-----------------------------|--------|--------|--------|--------|--------|--------|--------|--------|----------------|------|
|           |                   | Replicate                   |        |        |        |        |        |        |        | Mean   |                | S.D. |
|           |                   | 1                           | 2      | 3      | 4      | 5      | 6      | 7      | 8      |        |                |      |
| E         | 0.7               | 1465.6                      | 1160.8 | 953.6  | 1177.6 | 1177.6 | 1105.5 | 1121.2 | 1122.9 | 1160.6 | 142.7          | 0.4  |
| R         | 0.6               | 1622.7                      | 1220.7 | 1002.8 | 1238.4 | 1238.4 | 1162.5 | 1166.8 | 1180.9 | 1229.2 | 176.1          |      |

**Supplementary Table S1 :** Turgor measured in E and R cell types, using the « limit plasmolysis » technique.
